1 **Genetic analysis of the *STIM1* gene in chronic pancreatitis**

2  
3 Emmanuelle Masson,<sup>1,2,†</sup> Wen-Bin Zou,<sup>3,4,†</sup> Claudia Ruffert,<sup>5</sup> Vanessa Holste,<sup>6</sup> Patrick Michl,<sup>5</sup>  
4 Joachim Mössner,<sup>7</sup> Maren Ewers,<sup>6</sup> Helmut Laumen,<sup>6</sup> Hao Wu,<sup>3,4</sup> Dai-Zhan Zhou,<sup>8</sup> Zhao-Shen Li,<sup>3,4</sup>  
5 Dong Yu,<sup>9</sup> Arnaud Boulling,<sup>1</sup> Cédric Le Maréchal,<sup>1,2</sup> David N. Cooper,<sup>10</sup> Jian-Min Chen,<sup>1</sup>  
6 Heiko Witt,<sup>6</sup> Jonas Rosendahl,<sup>5</sup> Zhuan Liao,<sup>3,4,\*</sup> Claude Férec<sup>1,3,\*</sup>

7  
8 <sup>1</sup>Univ Brest, Inserm, EFS, UMR 1078, GGB, F-29200 Brest, France

9 <sup>2</sup>CHU Brest, Service de Génétique, Brest, France

10 <sup>3</sup>Department of Gastroenterology, Changhai Hospital, the Second Military Medical University,  
11 Shanghai, China

12 <sup>4</sup>Shanghai Institute of Pancreatic Diseases, Shanghai, China

13 <sup>5</sup>Department of Internal Medicine I, Martin Luther University, Halle, Germany

14 <sup>6</sup>Paediatric Nutritional Medicine, Else Kröner-Fresenius Zentrum für Ernährungsmedizin (EKfZ),  
15 Technische Universität München (TUM), Freising, Germany

16 <sup>7</sup>Department of Internal Medicine, Neurology and Dermatology, Division of Gastroenterology,  
17 University of Leipzig, Leipzig, Germany

18 <sup>8</sup>Key Laboratory of Developmental Genetics and Neuropsychiatric Diseases (Ministry of Education),  
19 Bio-X Institutes, Shanghai Jiao Tong University, Shanghai, China

20 <sup>9</sup>Center of Translational Medicine, the Second Military Medical University, Shanghai, China

21 <sup>10</sup>Institute of Medical Genetics, School of Medicine, Cardiff University, Cardiff, United Kingdom

22

23 †Emmanuelle Masson and Wen-Bin Zou share co-first authorship.

24

25 **\*Correspondence to:**

26 **Claude Férec**, INSERM U1078 and UBO, 22 avenue Camille Desmoulins, 29200 Brest, France.

27 email: [claud.ferec@univ-brest.fr](mailto:claud.ferec@univ-brest.fr).

28 **Zhuan Liao**, Department of Gastroenterology, Changhai Hospital, The Second Military Medical

29 University, 168 Changhai Road, Shanghai 200433, China. e-mail: [liao zhuan@smmu.edu.cn](mailto:liao zhuan@smmu.edu.cn).

## 30 **ABSTRACT**

31 Chronic pancreatitis is a complex disease that involves many factors, both genetic and  
32 environmental. Over the past two decades, molecular genetic analysis of five genes that are highly  
33 expressed in human pancreatic acinar cells, namely *PRSS1*, *PRSS2*, *SPINK1*, *CTRC* and  
34 *CTRB1/CTRB2*, has established that a trypsin-dependent pathway plays a key role in the etiology  
35 of chronic pancreatitis. Since  $\text{Ca}^{2+}$  deregulation can lead to intracellular trypsin activation in  
36 experimental acute pancreatitis, we analyzed *STIM1* (encoding stromal interaction molecule-1, the  
37 main regulator of  $\text{Ca}^{2+}$  homeostasis in pancreatic acinar cells) as a candidate modifier gene in  
38 French, German and Chinese patients with chronic pancreatitis. The French and German subjects  
39 were analyzed by Sanger sequencing whereas the Chinese subjects were analyzed by targeted  
40 next-generation sequencing confirmed by Sanger sequencing. A total of 37 rare coding variants (35  
41 missense and 2 nonsense) were identified, which were enriched in patients as compared with  
42 controls [2.28% (47/2,057) vs. 0.99% (33/3,322); odds ratio = 2.33,  $P = 0.0001$ ]. This is the first  
43 large case-control study to demonstrate a putative association of rare *STIM1* coding variants with  
44 chronic pancreatitis. Functional analysis will be required to clarify whether or not the rare *STIM1*  
45 variants detected predispose to pancreatitis.

## 46 47 **INTRODUCTION**

48 Chronic pancreatitis is a complex disease that is defined as “a pathologic fibro-inflammatory  
49 syndrome of the pancreas in individuals with genetic, environmental and/or other risk factors who  
50 develop persistent pathologic responses to parenchymal injury or stress” (Whitcomb et al., 2016).  
51 Over the past two decades, molecular genetic analysis of five genes that are highly expressed in  
52 human pancreatic acinar cells, namely *PRSS1* encoding cationic trypsinogen (Le Maréchal et al.,  
53 2006; Whitcomb et al., 1996), *PRSS2* encoding anionic trypsinogen (Witt et al., 2006), *SPINK1*  
54 encoding pancreatic secretory trypsin inhibitor (Witt et al., 2000), *CTRC* encoding chymotrypsin C  
55 (Masson et al., 2008; Rosendahl et al., 2008) and *CTRB1-CTRB2* encoding chymotrypsin B1 and  
56 B2 (Rosendahl et al., 2018), has established a trypsin-dependent pathway in the etiology of chronic  
57 pancreatitis (Hegyí and Sahin-Toth, 2017).

58 The majority of patients with chronic pancreatitis had prior clinically recognized acute  
59 pancreatitis (LaRusch et al., 2015), an acute inflammatory disease of the pancreas postulated to be  
60 an autodigestive disease triggered by prematurely activated trypsin within the pancreas (Chiari,  
61 1896). The association of gain-of-function *PRSS1* variants with both recurrent acute pancreatitis  
62 and chronic pancreatitis (Gorry et al., 1997; Whitcomb et al., 1996) not only provided support for  
63 Chiari’s original hypothesis (Chiari, 1896) but has also contributed to the Sentinel Acute  
64 Pancreatitis Event model for the development of chronic pancreatitis (Whitcomb, 1999).

65 Importantly, successive developments of spontaneous acute pancreatitis and chronic pancreatitis  
66 have recently been observed in genetically modified mice that carried a heterozygous p.Asp23Ala  
67 mutation within the activation peptide of the mouse cationic trypsinogen (Prss1) T7 isoform (the  
68 p.Asp23Ala mutant autoactivates to trypsin 50-fold faster than wild-type) (Geisz and Sahin-Tóth,  
69 2018).

70 The above notwithstanding, our understanding of the early events leading to pancreatitis is still  
71 rather limited. In this regard, prolonged and global Ca<sup>2+</sup> elevation (elicited by bile, alcohol  
72 metabolites and other causes) has been described to result in trypsin activation, vacuolization and  
73 necrosis of the pancreatic acinar cells in experimental acute pancreatitis (review in (Li et al., 2014));  
74 and stromal interaction molecule-1 (STIM1) is a key regulator for Ca<sup>2+</sup> homeostasis in both non-  
75 excitable and excitable cells (Yuan et al., 2009). These findings suggest that variants in the *STIM1*  
76 gene may contribute to the early steps of pancreatitis by disturbing Ca<sup>2+</sup> homeostasis within the  
77 pancreatic tissue.

78 Variants in the *STIM1* gene have been previously associated a number of diseases such as  
79 immunodeficiency and autoimmunity (Picard et al., 2009; Shaw et al., 2013), a novel syndrome of  
80 amelogenesis imperfecta and hypohidrosis (Parry et al., 2016), tubular-aggregate myopathy (Bohm  
81 et al., 2013; Nesin et al., 2014; Noury et al., 2017), or Stormorken syndrome (Misceo et al., 2014;  
82 Morin et al., 2014). Also, tubular aggregate myopathy and Stormorken syndrome patients carrying  
83 *STIM1* variants additionally manifested psychiatric disorders (Harris et al., 2017). Moreover, Sofia  
84 and colleagues have recently analyzed the *STIM1* gene (included within a panel of 70 genes  
85 related to six different pancreatic pathways) in 80 patients with idiopathic chronic pancreatitis (ICP)  
86 and found three missense mutations [i.e., c.1310G>A (p.Cys437Tyr), c.1589G>A (p.Arg530His),  
87 and c.2246G>A (p.Arg749His)] in different patients (Sofia et al., 2016). In addition to the relatively  
88 small number of patients analyzed, this study was limited by the lack of data from a corresponding  
89 control population. Herein, we report our findings from a comprehensive variant analysis of the  
90 *STIM1* gene in three ICP cohorts.

91

## 92 **PATIENTS AND METHODS**

### 93 **Patients**

94 This study included 436 French, 517 German and 1,104 Chinese patients with ICP (i.e., absence of  
95 both a positive family history and any of the following external precipitating factors, namely alcohol  
96 abuse, post-traumatic, hypercalcemic, hyperlipidemic and autoimmune) and corresponding healthy  
97 controls. The diagnosis of chronic pancreatitis was made as previously described (Witt et al., 2013;  
98 Zou et al., 2016). Informed consent was obtained from each patient and the study was approved by  
99 the respective ethics committees.

## 100 **Variant screening**

101 The French and German subjects were analyzed by Sanger sequencing; three multiplex PCRs  
102 were designed to amplify the entire coding sequence and flanking intronic sequences of the *STIM1*  
103 gene (see [additional file, Figures. S1 and S2](#)). The Chinese subjects were analyzed by targeted  
104 next-generation sequencing followed by Sanger sequencing confirmation, essentially as previously  
105 described (Wu et al., 2017; Zou et al., 2018), the primer sequences are provided in [Additional file,](#)  
106 [Figure S3](#).

## 108 **Variant nomenclature and reference sequences**

109 Variant nomenclature followed Human Genome Variation Society recommendations  
110 (<http://www.hgvs.org/mutnomen/recs.html>) (den Dunnen et al., 2016). GenBank accession number  
111 NM\_003156.3 was used as the *STIM1* mRNA reference sequence. *STIM1* genomic sequence was  
112 obtained from human GRCh38/hg38 (<https://genome.ucsc.edu/>).

## 114 **Pathogenicity prediction**

115 This was performed using the Combined Annotation-Dependent Depletion (CADD) method (Kircher  
116 et al., 2014) available at <https://cadd.gs.washington.edu/>.

## 118 **Statistical analyses**

119 The assessment of statistical significance of the differences between the carrier frequencies of the  
120 *STIM1* variants in patients and controls was performed by the 2x2 contingency table available at  
121 <http://vassarstats.net/odds2x2.html>. The difference was considered as being statistically significant  
122 when the *P* value was  $\leq 0.05$ .

## 124 **RESULTS AND DISCUSSION**

125 Given the importance of  $Ca^{2+}$  signaling for the regulation of pancreatic zymogen activation and the  
126 key role of *STIM1* in  $Ca^{2+}$  homeostasis, we analyzed the *STIM1* gene as a candidate modifier gene  
127 for chronic pancreatitis. Employing Sanger sequencing, we first analyzed the entire coding  
128 sequence (2,058 bp; NM\_003156.3) and exon/intron boundaries of the 12-exon *STIM1* gene in 436  
129 French ICP patients and 1,005 controls, and then repeated this analysis with 517 German ICP  
130 patients and 1,121 controls. Our subsequent analysis was limited to coding sequence variants that  
131 resulted in amino acid changes and intronic variants that affected canonical donor/acceptor splice  
132 sites. Eight such variants were identified in the French cohort and ten in the German cohort; all  
133 these variants were single nucleotide substitutions and all were predicted to result in missense  
134 substitutions ([Additional file, Tables S1 and S2](#)). Since all detected variants were rare variants

135 (defined as having a minor allele frequency of <0.5% in the control population as previously  
136 described (Manolio et al., 2009; Tennessen et al., 2012), we first performed aggregate association  
137 analysis in the context of each cohort. A significant enrichment of rare variants in patients as  
138 compared to controls was noted in the French cohort (odds ratio (OR) = 4.04,  $P = 0.002$ ) but not in  
139 the German cohort (OR = 1.64,  $P = 0.26$ ) (Table 1).

140 We also analyzed the *STIM1* gene in 1,104 Chinese ICP patients and 1,196 controls by means  
141 of targeted sequencing followed by Sanger sequencing validation. A total of 24 rare variants were  
142 identified (Additional file, Table S3), which when taken together were significantly overrepresented  
143 in patients as compared to controls (OR = 2.03,  $P = 0.03$ ; Table 1). A Breslow-Day test for  
144 homogeneity of the ORs (<https://www.prostatservices.com/>) between the French, German and  
145 Chinese cohorts showed no significant difference ( $P = 0.14$ ). We therefore combined data from  
146 these three cohorts (Table 2), the carrier frequency of the aggregated rare variants being  
147 significantly higher in patients than in controls (OR = 2.33,  $P = 0.0001$ ; Table 1).

148 Our comprehensive analysis of the *STIM1* gene in three ICP cohorts identified a significant  
149 enrichment of rare coding *STIM1* variants in patients as compared to controls by means of  
150 aggregate association analysis (Table 1). Notably, none of the identified 37 rare *STIM1* variants  
151 correspond to those previously reported to cause or predispose to other diseases (Lacruz and  
152 Feske, 2015), potentially strengthening the notion of the tissue-specific effects of different *STIM1*  
153 variants. However, pathogenicity prediction by means of the CADD method yielded similar findings  
154 among the three groups of variants namely, (i) variants found in only patients, (ii) variants found in  
155 both patients and controls and (iii) variants found in only controls (Table 2).

156 In summary, this is the first large case-control study to demonstrate a putative association of  
157 rare *STIM1* coding variants with chronic pancreatitis. Functional analysis will be required to clarify  
158 whether or not rare coding *STIM1* variants predispose to pancreatitis.

159

#### 160 **Disclosure statement**

161 The authors declare no conflict of interest.

162

#### 163 **Funding information**

164 Support for this study came from the National Natural Science Foundation of China (Grant  
165 Nos.81422010 and 81470884; to ZL), the Shuguang Program of Shanghai (Grant No. 15SG33; to  
166 ZL), the Chang Jiang Scholars Program of Ministry of Education, China (Grant No. Q2015190; to  
167 ZL), the Precision Medicine Program of the Second Military Medical University (Grant  
168 No.2017JZ02; to ZSL), the Scientific Innovation Program of Shanghai Municipal Education  
169 Committee (to ZL); the Else Kröner-Fresenius-Stiftung (EKFS) (to H.W.); the Deutsche

170 Forschungsgemeinschaft (DFG) grants RO 3929/1-1, RO 3929/2-1 & RO3929/5-1 (to J.R.) and by  
171 a grant of the Colora Stiftung GmbH (to J.R.); the Association des Pancréatites Chroniques  
172 Héréditaires and the Institut National de la Santé et de la Recherche Médicale (INSERM), France.

173

## 174 REFERENCES

- 175 Bohm J, Chevessier F, Maues De Paula A, Koch C, Attarian S, Feger C, Hantai D, Laforet P, Ghorab K, Vallat  
176 JM, Fardeau M, Figarella-Branger D, Pouget J, Romero NB, Koch M, Ebel C, Levy N, Krahn M, Eymard  
177 B, Bartoli M, Laporte J. Constitutive activation of the calcium sensor STIM1 causes tubular-aggregate  
178 myopathy. *Am J Hum Genet* 2013; **92**: 271-278.
- 179 Chiari H. Über Selbstverdauung des menschlichen Pankreas. *Z. Heilkunde* 1896; **17**: 69–96.
- 180 den Dunnen JT, Dalgleish R, Maglott DR, Hart RK, Greenblatt MS, McGowan-Jordan J, Roux AF, Smith T,  
181 Antonarakis SE, Taschner PE. HGVS recommendations for the description of sequence variants:  
182 2016 update. *Hum Mutat* 2016; **37**: 564-569.
- 183 Geisz A, Sahin-Tóth M. A preclinical model of chronic pancreatitis driven by trypsinogen autoactivation. *Nat*  
184 *Commun* 2018; **9**: 5033.
- 185 Gorry MC, Gabbazedeh D, Furey W, Gates LK, Jr., Preston RA, Aston CE, Zhang Y, Ulrich C, Ehrlich GD,  
186 Whitcomb DC. Mutations in the cationic trypsinogen gene are associated with recurrent acute and  
187 chronic pancreatitis. *Gastroenterology* 1997; **113**: 1063-1068.
- 188 Harris E, Burki U, Marini-Bettolo C, Neri M, Scotton C, Hudson J, Bertoli M, Evangelista T, Vroling B,  
189 Polvikoski T, Roberts M, Topf A, Bushby K, McArthur D, Lochmuller H, Ferlini A, Straub V, Barresi R.  
190 Complex phenotypes associated with *STIM1* mutations in both coiled coil and EF-hand domains.  
191 *Neuromuscul Disord* 2017; **27**: 861-872.
- 192 Hegyi E, Sahin-Toth M. Genetic risk in chronic pancreatitis: the trypsin-dependent pathway. *Dig Dis Sci* 2017;  
193 **62**: 1692-1701.
- 194 Kircher M, Witten DM, Jain P, O'Roak BJ, Cooper GM, Shendure J. A general framework for estimating the  
195 relative pathogenicity of human genetic variants. *Nat Genet* 2014; **46**: 310-315.
- 196 Lacruz RS, Feske S. Diseases caused by mutations in *ORAI1* and *STIM1*. *Ann N Y Acad Sci* 2015; **1356**: 45-79.
- 197 LaRusch J, Lozano-Leon A, Stello K, Moore A, Muddana V, O'Connell M, Diergaard B, Yadav D, Whitcomb  
198 DC. The common chymotrypsinogen C (*CTRC*) variant G60G (C.180T) increases risk of chronic  
199 pancreatitis but not recurrent acute pancreatitis in a north American population. *Clin Transl*  
200 *Gastroenterol* 2015; **6**: e68.
- 201 Le Maréchal C, Masson E, Chen JM, Morel F, Ruzniewski P, Levy P, Férec C. Hereditary pancreatitis caused  
202 by triplication of the trypsinogen locus. *Nat Genet* 2006; **38**: 1372-1374.
- 203 Li J, Zhou R, Zhang J, Li ZF. Calcium signaling of pancreatic acinar cells in the pathogenesis of pancreatitis.  
204 *World J Gastroenterol* 2014; **20**: 16146-16152.
- 205 Manolio TA, Collins FS, Cox NJ, Goldstein DB, Hindorff LA, Hunter DJ, McCarthy MI, Ramos EM, Cardon LR,  
206 Chakravarti A, Cho JH, Guttmacher AE, Kong A, Kruglyak L, Mardis E, Rotimi CN, Slatkin M, Valle D,  
207 Whittemore AS, Boehnke M, Clark AG, Eichler EE, Gibson G, Haines JL, Mackay TF, McCarroll SA,  
208 Visscher PM. Finding the missing heritability of complex diseases. *Nature* 2009; **461**: 747-753.
- 209 Masson E, Chen JM, Scotet V, Le Maréchal C, Férec C. Association of rare chymotrypsinogen C (*CTRC*) gene  
210 variations in patients with idiopathic chronic pancreatitis. *Hum Genet* 2008; **123**: 83-91.
- 211 Misceo D, Holmgren A, Louch WE, Holme PA, Mizobuchi M, Morales RJ, De Paula AM, Stray-Pedersen A, Lyle  
212 R, Dalhus B, Christensen G, Stormorken H, Tjonnfjord GE, Frengen E. A dominant *STIM1* mutation  
213 causes Stormorken syndrome. *Hum Mutat* 2014; **35**: 556-564.
- 214 Morin G, Bruechle NO, Singh AR, Knopp C, Jedraszak G, Elbracht M, Bremond-Gignac D, Hartmann K,  
215 Sevestre H, Deutz P, Herent D, Nurnberg P, Romeo B, Konrad K, Mathieu-Dramard M, Oldenburg J,



- 216 Bourges-Petit E, Shen Y, Zerres K, Ouadid-Ahidouch H, Rochette J. Gain-of-Function Mutation in  
217 *STIM1* (P.R304W) Is Associated with Stormorken Syndrome. *Hum Mutat* 2014; **35**: 1221-1232.
- 218 Nesin V, Wiley G, Kousi M, Ong EC, Lehmann T, Nicholl DJ, Suri M, Shahrizaila N, Katsanis N, Gaffney PM,  
219 Wierenga KJ, Tsiokas L. Activating mutations in *STIM1* and *ORAI1* cause overlapping syndromes of  
220 tubular myopathy and congenital miosis. *Proc Natl Acad Sci U S A* 2014; **111**: 4197-4202.
- 221 Noury JB, Bohm J, Peche GA, Guyant-Marechal L, Bedat-Millet AL, Chiche L, Carlier RY, Malfatti E, Romero  
222 NB, Stojkovic T. Tubular aggregate myopathy with features of Stormorken disease due to a new  
223 *STIM1* mutation. *Neuromuscul Disord* 2017; **27**: 78-82.
- 224 Parry DA, Holmes TD, Gamper N, El-Sayed W, Hettiarachchi NT, Ahmed M, Cook GP, Logan CV, Johnson CA,  
225 Joss S, Peers C, Prescott K, Savic S, Inglehearn CF, Mighell AJ. A homozygous *STIM1* mutation impairs  
226 store-operated calcium entry and natural killer cell effector function without clinical  
227 immunodeficiency. *J Allergy Clin Immunol* 2016; **137**: 955-957 e958.
- 228 Picard C, McCarl CA, Papolos A, Khalil S, Luthy K, Hivroz C, LeDeist F, Rieux-Laucat F, Rechavi G, Rao A,  
229 Fischer A, Feske S. *STIM1* mutation associated with a syndrome of immunodeficiency and  
230 autoimmunity. *N Engl J Med* 2009; **360**: 1971-1980.
- 231 Rosendahl J, Kirsten H, Hegyi E, Kovacs P, Weiss FU, Laumen H, Lichtner P, Ruffert C, Chen JM, Masson E,  
232 Beer S, Zimmer C, Seltsam K, Algul H, Buhler F, Bruno MJ, Bugert P, Burkhardt R, Cavestro GM,  
233 Cichoż-Lach H, Farre A, Frank J, Gambaro G, Gimpfl S, Grallert H, Griesmann H, Grutzmann R,  
234 Hellerbrand C, Hegyi P, Hollenbach M, Iordache S, Jurkowska G, Keim V, Kiefer F, Krug S, Landt O,  
235 Leo MD, Lerch MM, Levy P, Loffler M, Lohr M, Ludwig M, Macek M, Malats N, Malecka-Panas E,  
236 Malerba G, Mann K, Mayerle J, Mohr S, Te Morsche RHM, Motyka M, Mueller S, Muller T, Nothen  
237 MM, Pedrazzoli S, Pereira SP, Peters A, Pflutzer R, Real FX, Rebours V, Ridinger M, Rietschel M,  
238 Rosmann E, Saftoiu A, Schneider A, Schulz HU, Soranzo N, Soyka M, Simon P, Skipworth J, Stickle F,  
239 Strauch K, Stumvoll M, Testoni PA, Tonjes A, Werner L, Werner J, Wodarz N, Ziegler M, Masamune  
240 A, Mossner J, Ferec C, Michl P, J PHD, Witt H, Scholz M, Sahin-Toth M, all members of the  
241 PanEuropean Working group on ACP. Genome-wide association study identifies inversion in the  
242 *CTRB1-CTRB2* locus to modify risk for alcoholic and non-alcoholic chronic pancreatitis. *Gut* 2018; **67**:  
243 1855-1863.
- 244 Rosendahl J, Witt H, Szmola R, Bhatia E, Ozsvári B, Landt O, Schulz HU, Gress TM, Pflutzer R, Lohr M, Kovacs  
245 P, Bluher M, Stumvoll M, Choudhuri G, Hegyi P, te Morsche RH, Drenth JP, Truninger K, Macek M,  
246 Jr., Puhl G, Witt U, Schmidt H, Buning C, Ockenga J, Kage A, Groneberg DA, Nickel R, Berg T,  
247 Wiedenmann B, Bodeker H, Keim V, Mossner J, Teich N, Sahin-Toth M. Chymotrypsin C (CTRC)  
248 variants that diminish activity or secretion are associated with chronic pancreatitis. *Nat Genet* 2008;  
249 **40**: 78-82.
- 250 Shaw PJ, Qu B, Hoth M, Feske S. Molecular regulation of CRAC channels and their role in lymphocyte  
251 function. *Cell Mol Life Sci* 2013; **70**: 2637-2656.
- 252 Sofia VM, Da Sacco L, Surace C, Tomaiuolo AC, Genovese S, Grotta S, Gnazzo M, Petrocchi S, Ciocca L, Alghisi  
253 F, Montemitto E, Martemucci L, Elce A, Lucidi V, Castaldo G, Angioni A. Extensive molecular analysis  
254 suggested the strong genetic heterogeneity of idiopathic chronic pancreatitis. *Mol Med* 2016; **22**:  
255 300-309.
- 256 Tennessen JA, Bigham AW, O'Connor TD, Fu W, Kenny EE, Gravel S, McGee S, Do R, Liu X, Jun G, Kang HM,  
257 Jordan D, Leal SM, Gabriel S, Rieder MJ, Abecasis G, Altshuler D, Nickerson DA, Boerwinkle E,  
258 Sunyaev S, Bustamante CD, Bamshad MJ, Akey JM, Broad GO, Seattle GO, Project NES. Evolution  
259 and functional impact of rare coding variation from deep sequencing of human exomes. *Science*  
260 2012; **337**: 64-69.
- 261 Whitcomb DC. Hereditary pancreatitis: new insights into acute and chronic pancreatitis. *Gut* 1999; **45**: 317-  
262 322.

- 263 Whitcomb DC, Frulloni L, Garg P, Greer JB, Schneider A, Yadav D, Shimosegawa T. Chronic pancreatitis: An  
264 international draft consensus proposal for a new mechanistic definition. *Pancreatology* 2016; **16**:  
265 218-224.
- 266 Whitcomb DC, Gorry MC, Preston RA, Furey W, Sossenheimer MJ, Ulrich CD, Martin SP, Gates LK, Jr., Amann  
267 ST, Toskes PP, Liddle R, McGrath K, Uomo G, Post JC, Ehrlich GD. Hereditary pancreatitis is caused by  
268 a mutation in the cationic trypsinogen gene. *Nat Genet* 1996; **14**: 141-145.
- 269 Witt H, Beer S, Rosendahl J, Chen JM, Chandak GR, Masamune A, Bence M, Szmola R, Oracz G, Macek M, Jr.,  
270 Bhatia E, Steigenberger S, Lasher D, Buhler F, Delaporte C, Tebbing J, Ludwig M, Pilsak C, Saum K,  
271 Bugert P, Masson E, Paliwal S, Bhaskar S, Sobczynska-Tomaszewska A, Bak D, Balascak I, Choudhuri  
272 G, Nageshwar Reddy D, Rao GV, Thomas V, Kume K, Nakano E, Kakuta Y, Shimosegawa T, Durko L,  
273 Szabo A, Schnur A, Hegyi P, Rakonczay Z, Jr., Pfutzer R, Schneider A, Groneberg DA, Braun M,  
274 Schmidt H, Witt U, Friess H, Algul H, Landt O, Schuelke M, Kruger R, Wiedenmann B, Schmidt F,  
275 Zimmer KP, Kovacs P, Stumvoll M, Bluher M, Muller T, Janecke A, Teich N, Grutzmann R, Schulz HU,  
276 Mossner J, Keim V, Lohr M, Ferec C, Sahin-Toth M. Variants in *CPA1* are strongly associated with  
277 early onset chronic pancreatitis. *Nat Genet* 2013; **45**: 1216-1220.
- 278 Witt H, Luck W, Hennies HC, Classen M, Kage A, Lass U, Landt O, Becker M. Mutations in the gene encoding  
279 the serine protease inhibitor, Kazal type 1 are associated with chronic pancreatitis. *Nat Genet* 2000;  
280 **25**: 213-216.
- 281 Witt H, Sahin-Tóth M, Landt O, Chen JM, Kahne T, Drenth JP, Kukor Z, Szepessy E, Halangk W, Dahm S,  
282 Rohde K, Schulz HU, Le Marechal C, Akar N, Ammann RW, Truninger K, Bargetzi M, Bhatia E,  
283 Castellani C, Cavestro GM, Cerny M, Destro-Bisol G, Spedini G, Eiberg H, Jansen JB, Koudova M,  
284 Rausova E, Macek M, Jr., Malats N, Real FX, Menzel HJ, Moral P, Galavotti R, Pignatti PF, Rickards O,  
285 Spicak J, Zarnescu NO, Bock W, Gress TM, Friess H, Ockenga J, Schmidt H, Pfutzer R, Lohr M, Simon  
286 P, Weiss FU, Lerch MM, Teich N, Keim V, Berg T, Wiedenmann B, Luck W, Groneberg DA, Becker M,  
287 Keil T, Kage A, Bernardova J, Braun M, Guldner C, Halangk J, Rosendahl J, Witt U, Treiber M, Nickel  
288 R, Ferec C. A degradation-sensitive anionic trypsinogen (*PRSS2*) variant protects against chronic  
289 pancreatitis. *Nat Genet* 2006; **38**: 668-673.
- 290 Wu H, Zhou DZ, Berki D, Geisz A, Zou WB, Sun XT, Hu LH, Zhao ZH, Zhao AJ, He L, Cooper DN, Férec C, Chen  
291 JM, Li ZS, Sahin-Tóth M, Liao Z. No significant enrichment of rare functionally defective *CPA1*  
292 variants in a large Chinese idiopathic chronic pancreatitis cohort. *Hum Mutat* 2017; **38**: 959-963.
- 293 Yuan JP, Kim MS, Zeng W, Shin DM, Huang G, Worley PF, Muallem S. TRPC channels as STIM1-regulated  
294 SOCs. *Channels (Austin)* 2009; **3**: 221-225.
- 295 Zou WB, Boulling A, Masamune A, Issarapu P, Masson E, Wu H, Sun XT, Hu LH, Zhou DZ, He L, Fichou Y,  
296 Nakano E, Hamada S, Kakuta Y, Kume K, Isayama H, Paliwal S, Mani KR, Bhaskar S, Cooper DN, Férec  
297 C, Shimosegawa T, Chandak GR, Chen JM, Li ZS, Liao Z. No association between *CEL-HYB* hybrid  
298 allele and chronic pancreatitis in Asian populations. *Gastroenterology* 2016; **150**: 1558-1560.e5.
- 299 Zou WB, Tang XY, Zhou DZ, Qian YY, Hu LH, Yu FF, Yu D, Wu H, Deng SJ, Lin JH, Zhao AJ, Zhao ZH, Wu HY, Zhu  
300 JH, Qian W, Wang L, Xin L, Wang MJ, Wang LJ, Fang X, He L, Masson E, Cooper DN, Férec C, Li ZS,  
301 Chen JM, Liao Z. *SPINK1*, *PRSS1*, *CTRC*, and *CFTR* genotypes influence disease onset and clinical  
302 outcomes in chronic pancreatitis. *Clin Transl Gastroenterol* 2018; **9**: 204.



303 **Table 1.** Prevalence of *STIM1* variants in ICP patients versus controls in the French, German and  
304 Chinese Populations

| <b>Population</b>  | <b>Cases</b>    | <b>Controls</b> | <b>Odds ratio</b> | <b>95% confidence interval</b> | <b>P value</b> |
|--------------------|-----------------|-----------------|-------------------|--------------------------------|----------------|
|                    | +/n (%)         | +/n (%)         |                   |                                |                |
| French             | 12/436 (2.75)   | 7/1,005 (0.70)  | 4.04              | 1.58-10.32                     | 0.002          |
| German             | 9/517 (1.74)    | 12/1,121 (1.07) | 1.64              | 0.69-3.91                      | 0.26           |
| Chinese            | 26/1,104 (2.36) | 14/1,196 (1.17) | 2.03              | 1.06-3.92                      | 0.03           |
| All three combined | 47/2,057 (2.28) | 33/3,322 (0.99) | 2.33              | 1.49-3.65                      | 0.0001         |

305

**Table 2.** *STIM1* variants in the combined French, German and Chinese cohorts

| Exon                                              | Nucleotide change | Amino acid change        | Patients<br>(n = 2,057) |               | Controls<br>(n = 3,322) |               | rs number   | Allele frequency in gnomAD | CADD score |
|---------------------------------------------------|-------------------|--------------------------|-------------------------|---------------|-------------------------|---------------|-------------|----------------------------|------------|
|                                                   |                   |                          | + (%)                   | Population(s) | + (%)                   | Population(s) |             |                            |            |
| <b>Variants detected in patients only</b>         |                   |                          |                         |               |                         |               |             |                            |            |
| 1                                                 | c.91G>C           | p.Ala31Pro               | 1 (0.05)                | F             | 0 (0)                   |               | rs368091975 | 1.19e-5                    | 16.10      |
| 1                                                 | c.107C>T          | p.Ser36Leu               | 1 (0.05)                | G             | 0 (0)                   |               | rs200907515 | 3.18e-5                    | 13.72      |
| 1                                                 | c.112G>C          | p.Ala38Pro               | 1 (0.05)                | F             | 0 (0)                   |               | rs774499633 | No                         | 14.95      |
| 1                                                 | c.113C>T          | p.Ala38Val               | 1 (0.05)                | C             | 0 (0)                   |               | No          | No                         | 13.93      |
| 4                                                 | c.454G>A          | p.Glu152Lys <sup>a</sup> | 3 (0.15)                | C (1), F (2)  | 0 (0)                   |               | rs143916878 | 1.16e-4                    | 23.2       |
| 6                                                 | c.747G>C          | p.Glu249Asp              | 1 (0.05)                | C             | 0 (0)                   |               | No          | No                         | 18.57      |
| 9                                                 | c.1231A>G         | p.Thr411Ala              | 1 (0.09)                | C             | 0 (0)                   |               | No          | No                         | 18.54      |
| 11                                                | c.1498C>T         | p.Arg500Trp              | 1 (0.05)                | C             | 0 (0)                   |               | rs772902514 | 1.59e-5                    | 33         |
| 12                                                | c.1562C>T         | p.Ser521Leu              | 2 (0.10)                | C (1), G (1)  | 0 (0)                   |               | rs745539009 | 1.59e-5                    | 24.5       |
| 12                                                | c.1595G>A         | p.Arg532His              | 1 (0.05)                | C             | 0 (0)                   |               | rs771442242 | 7.96e-6                    | 26.5       |
| 12                                                | c.1615C>T         | p.Gln539Ter              | 1 (0.05)                | C             | 0 (0)                   |               | No          | No                         | 41         |
| 12                                                | c.1668C>G         | p.Ser556Arg              | 5 (0.24)                | C             | 0 (0)                   |               | rs201543900 | 4.24e-5                    | 22.6       |
| 12                                                | c.1801C>T         | p.Pro601Ser              | 1 (0.05)                | G             | 0 (0)                   |               | rs200960094 | 3.98e-5                    | 16.68      |
| 12                                                | c.1808C>T         | p.Ala603Val              | 1 (0.05)                | C             | 0 (0)                   |               | rs749622475 | 1.19e-5                    | 19.32      |
| 12                                                | c.1843C>T         | p.Arg615Cys              | 3 (0.15)                | C             | 0 (0)                   |               | rs560566339 | 1.19e-5                    | 28.5       |
| 12                                                | c.2012G>A         | p.Arg671Gln              | 1 (0.05)                | C             | 0 (0)                   |               | rs779204802 | 8.04e-6                    | 24.3       |
| <b>Variants detected in patients and controls</b> |                   |                          |                         |               |                         |               |             |                            |            |
| 4                                                 | c.458C>T          | p.Thr153Ile              | 3 (0.15)                | F (1), G (2)  | 1 (0.03)                | F             | rs144602692 | 1.94e-4                    | 23.8       |

|                                           |           |             |           |              |           |              |             |         |       |
|-------------------------------------------|-----------|-------------|-----------|--------------|-----------|--------------|-------------|---------|-------|
| 11                                        | c.1511C>T | p.Thr504Met | 2 (0.10)  | C            | 1 (0.03)  | C            | rs146873551 | 8.28e-4 | 20.8  |
| 12                                        | c.1571C>T | p.Ser524Phe | 5 (0.24)  | F (2), G (3) | 8 (0.24)  | F (4), G (4) | rs141215990 | 1.78e-3 | 29.1  |
| 12                                        | c.1589G>A | p.Arg530His | 6 (0.29)  | C            | 3 (0.09)  | C            | rs746517083 | 3.18e-5 | 24.5  |
| 12                                        | c.1612C>T | p.Pro538Ser | 4 (0.19)  | F            | 1 (0.03)  | F            | rs35960304  | 5.95e-3 | 20.2  |
| 12                                        | c.1636G>A | p.Glu546Lys | 2 (0.10)  | F (1), G (1) | 2 (0.06)  | G            | rs371443357 | 3.54e-5 | 23.9  |
| <b>Variants detected in controls only</b> |           |             |           |              |           |              |             |         |       |
| 4                                         | c.408G>C  | p.Glu136Asp | 0 (0)     |              | 1 (0.03)  | C            | rs200648767 | 1.77e-4 | 13.79 |
| 4                                         | c.472C>G  | p.Gln158Glu | 0 (0)     |              | 1 (0.03)  | C            | No          | No      | 21.3  |
| 5                                         | c.530C>T  | p.Thr177Ile | 0 (0)     |              | 1 (0.03)  | C            | rs761973338 | 3.18e-5 | 24.6  |
| 7                                         | c.826G>C  | p.Glu276Gln | 0 (0)     |              | 1 (0.03)  | C            | No          | No      | 23.0  |
| 8                                         | c.1010C>T | p.Ser337Phe | 0 (0)     |              | 1 (0.03)  | G            | No          | No      | 27.6  |
| 11                                        | c.1499G>A | p.Arg500Gln | 0 (0)     |              | 1 (0.03)  | C            | rs760242778 | 7.97e-6 | 29.4  |
| 11                                        | c.1505G>A | p.Arg502His | 0 (0)     |              | 1 (0.03)  | C            | rs555016539 | 1.19e-5 | 27.3  |
| 12                                        | c.1583G>A | p.Ser528Asn | 0 (0)     |              | 1 (0.03)  | C            | rs200078549 | 2.39e-5 | 24.0  |
| 12                                        | c.1601C>A | p.Ala534Asp | 0 (0)     |              | 1 (0.03)  | F            | No          | No      | 14.12 |
| 12                                        | c.1624C>T | p.Arg542Cys | 0 (0)     |              | 1 (0.03)  | C            | rs370846246 | 3.58e-5 | 28.3  |
| 12                                        | c.1673G>A | p.Arg558Gln | 0 (0)     |              | 1 (0.03)  | C            | rs199503470 | 1.59e-5 | 24.4  |
| 12                                        | c.1681G>A | p.Glu561Lys | 0 (0)     |              | 1 (0.03)  | G            | rs200557274 | 1.99e-5 | 31    |
| 12                                        | c.1928G>A | p.Arg643His | 0 (0)     |              | 3 (0.09)  | G            | rs140080199 | 7.57e-4 | 31    |
| 12                                        | c.1960G>A | p.Ala654Thr | 0 (0)     |              | 1 (0.03)  | G            | rs201466902 | 1.41e-4 | 21.8  |
| 12                                        | c.2053A>T | p.Lys685Ter | 0 (0)     |              | 1 (0.03)  | C            | No          | No      | 42    |
| Total                                     |           |             | 47 (2.28) |              | 33 (0.99) |              |             |         |       |

All variants were found in the heterozygous state. C, Chinese. F, French. G, Germany.
